1 **3D observation of large-scale subcellular dynamics *in vivo* at**  
2 **the millisecond scale**

3 Jiamin Wu<sup>1,2\*</sup>, Zhi Lu<sup>1,2\*</sup>, Hui Qiao<sup>1,2</sup>, Xu Zhang<sup>1,2</sup>, Karl Zhanghao<sup>3</sup>, Hao Xie<sup>1,2</sup>, Tao  
4 Yan<sup>1,2</sup>, Guoxun Zhang<sup>1,2</sup>, Xiaoxu Li<sup>1,2</sup>, Zheng Jiang<sup>6</sup>, Xing Lin<sup>1,4</sup>, Lu Fang<sup>5</sup>, Bing Zhou<sup>7</sup>,  
5 Jingtao Fan<sup>1,2†</sup>, Peng Xi<sup>3†</sup> & Qionghai Dai<sup>1,2†</sup>

6 <sup>1</sup>*Department of Automation, Tsinghua University, Beijing, 100084, China*

7 <sup>2</sup>*Beijing Key Laboratory of Multi-dimension & Multi-scale Computational Photography*  
8 *(MMCP), School of Software, Tsinghua University, Beijing 100084, China.*

9 <sup>3</sup>*Department of Biomedical Engineering, College of Engineering, Peking University,*  
10 *Beijing 100871, China.*

11 <sup>4</sup>*Electrical and Computer Engineering Department, University of California, Los*  
12 *Angeles, CA 90095, USA.*

13 <sup>5</sup>*Tsinghua - Berkeley Shenzhen Institute (TBSI), Tsinghua University, Shenzhen 100084,*  
14 *China.*

15 <sup>6</sup>*State Key Laboratory of Membrane Biology, Tsinghua-Peking Center for Life Sciences,*  
16 *School of Life Sciences, Tsinghua University, Beijing 100084, China.*

17 <sup>7</sup>*Advanced Innovation Center for Big Data-Based Precision Medicine, School of*  
18 *Biological Science and Medical Engineering, Beihang University, Beijing 100191,*  
19 *China.*

20 <sup>\*</sup>*These authors contributed equally to this work*

21

22 <sup>†</sup>Correspondence: [qh dai@tsinghua.edu.cn](mailto:qh dai@tsinghua.edu.cn) (Q. D.), [xipeng@pku.edu.cn](mailto:xipeng@pku.edu.cn) (P. X.),  
23 [fanjingtao@mail.tsinghua.edu.cn](mailto:fanjingtao@mail.tsinghua.edu.cn) (J. F.)

24

1 **Observing large-scale three-dimensional (3D) subcellular dynamics *in vivo* at high**  
2 **spatiotemporal resolution has long been a pursuit for biology. However, both the**  
3 **signal-to-noise ratio and resolution degradation in multicellular organisms pose**  
4 **great challenges. Here, we propose a method, termed Digital Adaptive Optics**  
5 **Scanning Lightfield Mutual Iterative Tomography (DAOSLIMIT), featuring both**  
6 **3D incoherent synthetic aperture and tiled wavefront correction in post-processing.**  
7 **We achieve aberration-free fluorescence imaging *in vivo* over a  $150 \times 150 \times 16 \mu\text{m}^3$**   
8 **field-of-view with the spatiotemporal resolution up to 250 nm laterally and 320 nm**  
9 **axially at 100 Hz, corresponding to a huge data throughput of over 15 Giga-voxels**  
10 **per second. Various fast subcellular processes are observed, including**  
11 **mitochondrial dynamics in cultured neurons, membrane dynamics in zebrafish**  
12 **embryos, and calcium propagation in cardiac cells, human cerebral organoids, and**  
13 ***Drosophila* larval neurons, enabling simultaneous *in vivo* studies of morphological**  
14 **and functional dynamics in 3D.**

15 Cells in living organs compose an exquisite microscopic world in which the logistics,  
16 plasticity, interaction, and migration of multiple subcellular organelles can only be  
17 appreciated with high spatiotemporal resolution<sup>1,2</sup>. However, current microscopy  
18 techniques only image a certain plane at one time, with three-dimensional (3D) imaging  
19 obtained through movements of the focal plane relative to the specimen, such as  
20 confocal<sup>3,4</sup>, structured illumination<sup>5,6</sup>, light sheet microscopy<sup>7-9</sup>, etc. A few emerging  
21 imaging techniques<sup>10</sup> aiming at simultaneous 3D imaging have been developed recently,  
22 such as light field microscopy (LFM)<sup>11,12</sup>, multi-focus microscopy<sup>13,14</sup>, etc. Although  
23 LFM has achieved great success in high-speed large-scale 3D calcium imaging<sup>12,15,16</sup> with  
24 single-cell resolution, its resolution is typically limited to  $\sim 1 \mu\text{m}$  by the intrinsic trade-off  
25 between spatial and angular precision<sup>17,18</sup>, which is barely enough for subcellular  
26 structures. With holographic gratings, multi-focus images can be detected simultaneously  
27 at different areas on a large CCD camera<sup>13,19</sup>. However, they can only collect several

1 discrete layers of the focal stack within a snapshot, and the total exposure time required  
2 for a high signal-to-noise ratio (SNR) is similar to that of axial-scanning methods due to  
3 the beam-splitting process. Considering the confined photon budget in fluorescence  
4 microscopy, the 3D imaging speed is crucially limited by the SNR of the imaging  
5 framework with the same exposure time<sup>10</sup>.

6 3D imaging of live cells requires not only high speed at high resolution but also faces an  
7 obstacle: the refractive index distribution changes along with the intracellular activity,  
8 creating significant aberrations by the crowded subcellular organelles. Such a common  
9 problem in multi-cellular organisms<sup>2</sup> and biological tissues<sup>20</sup> will reduce the resolution  
10 and SNR simultaneously, especially for objectives with high numerical aperture (NA)<sup>21</sup>.  
11 Adaptive optics (AO) is a technique commonly employed in telescopes against such  
12 distortions in which a microlens array and a 2D detector form a Shack-Hartmann  
13 wavefront sensor and an active phase modulator array is used for wavefront correction<sup>21</sup>.  
14 AO has successfully promoted the resolution of intravital optical microscopy to the  
15 diffraction limit<sup>2</sup>. However, one fundamental drawback for current AO is that, because  
16 the aberration changes over both time and locations, one can either use tiled AO for the  
17 entire imaging plane or compromise the correction mask by averaging phase distortions  
18 at different positions<sup>22</sup>. Applying a unique phase modulation to each pixel is too time-  
19 consuming, and sometimes it becomes impossible due to the lack of a guide star<sup>21</sup>.  
20 Although computational adaptive optics has achieved great success in optical coherence  
21 tomography<sup>23,24</sup> and bright-field imaging, recently, it has been hard to apply in high-speed  
22 fluorescence imaging due to the incoherent property and low-photon condition.

23 To address all of these issues, we report digital adaptive optics scanning lightfield mutual  
24 iterative tomography (DAOSLIMIT), to realize aberration-free 3D fluorescence imaging  
25 at ultra-high spatiotemporal resolution across a large-scale volume. Based on LFM,  
26 instant 3D volumetric imaging can be acquired with high SNR in a tomographic way. The

1 limited resolution of LFM can be compensated through the incoherent synthetic aperture  
2 of scanning LFM (sLFM). Moreover, we perform digital AO (DAO) with sLFM in post-  
3 processing, so that the phase distortion of every pixel can be corrected without  
4 compromising the data-acquisition speed, enabling real-time multi-site AO correction in  
5 fluorescence imaging, which was previously impossible. To avoid the loss of temporal  
6 resolution induced by scanning and further enhance the SNR for high-speed imaging,  
7 both time-loop and time-weighted algorithms are developed to fully exploit the  
8 redundancy of four-dimensional (4D) time-lapse video. The proposed DAOSLIMIT, to  
9 the best of our knowledge, provides orders-of-magnitude improvement in the  
10 spatiotemporal resolution for *in vivo* 3D fluorescence imaging with compact systems.

## 1 **Principle of DAOSLIMIT and experimental setup-up**

2 Our DAOSLIMIT is built on a commercial epifluorescence microscope, with a microlens  
3 array inserted at the image plane for parallel acquisition of the low-resolution 4D phase  
4 space (Fig. 1a). Different sub-aperture components (labelled with different colours in Fig.  
5 1a) at every local area are sampled by corresponding sensor pixels after each microlens.  
6 The microlens aperture is so small (approximately 5-6 times larger than the diffraction  
7 limit at the image plane), that it functions like the single-slit diffraction and produces  
8 frequency aliasing between different sub-aperture components<sup>25</sup>. The aliasing introduces  
9 coherence between the multiplexed phase space even for incoherent conditions, which is  
10 essential for the incoherent synthetic aperture. A two-dimensional galvo scanning system  
11 is utilized to shift the image plane by steps smaller than the pitch size of each microlens,  
12 which is equivalent to moving the microlens array relatively but in a much faster and  
13 more precise way. The scanning process introduces the spatial overlap of the local  
14 coherence measurements and increases the resolution of multiplexed phase-space  
15 measurements (Extended Data Fig. 1a, b). For illumination, a large volume within our 3D  
16 reconstruction range is excited simultaneously by a thick inclined illumination, which is  
17 effective for removing the out-of-range background fluorescence and preventing  
18 unnecessary photobleaching (Extended Data Fig. 1c). During data reconstruction, the  
19 sequentially scanned LFM images are first rearranged to get high-resolution multiplexed  
20 phase space (Supplementary Note 1 and Extended Data Fig. 2). Then, a mutual iterative  
21 tomography algorithm is developed to reconstruct the high-resolution 3D volume with  
22 the tiled wavefront correction for every pixel, which is critical for the inhomogeneous  
23 refractive index in multicellular organisms.

24 The 4D phase-space measurements facilitate digital beam synthesis in both  
25 coherent<sup>26</sup> and partially coherent conditions<sup>27</sup>, providing sufficient information for 3D  
26 reconstruction (Fig. 1b, Supplementary Note 2, and Extended Data Fig. 3). However, the

1 aberrations induced by the sample and optical system itself result in a distorted focus<sup>21</sup>  
2 that was hardly recognized in previous LFM due to the reduced spatial resolution. To  
3 create a perfect focus, we digitally shift the sub-aperture point spread function (PSF),  
4 because a linear phase modulation at the segmented rear pupil function represents a  
5 specific lateral shift of the corresponding sub-aperture PSF (Supplementary Note 3). Such  
6 a process is analogous to AO via pupil segmentation by applying an estimated correction  
7 wavefront<sup>20</sup>. In addition, both the overlap in spatial domain induced by the scanning and  
8 the frequency aliasing in the angular domain facilitate the incoherent synthetic aperture  
9 during 3D reconstruction. As with the techniques sharing similar support constraints for  
10 recovery, such as ptychography<sup>26,28</sup> and Wigner-distribution deconvolution<sup>29</sup>, we can  
11 achieve the diffraction limit of the whole objective NA with iterative updates of a  
12 consistent volume (Supplementary Note 4, and Extended Data Fig. 4).

# 1 **Results**

## 2 **3D synthetic aperture with digital adaptive optics for incoherent conditions**

3 By measuring the local variance of coherence, phase-space imaging setups provide a  
4 computational method for 3D imaging, especially for partially coherent and incoherent  
5 conditions<sup>27,30</sup>. However, even with advanced algorithms<sup>17,25,31</sup>, the reconstructed lateral  
6 resolution without sacrificing the depth-of-field (DOF) is still limited to  $\sim 1 \mu\text{m}$  due to the  
7 failure of aperture synthesis in partially coherent and incoherent conditions such as  
8 fluorescence microscopy<sup>10</sup>. To mitigate the fundamental challenge, multiplexed phase-  
9 space measurements with coded aperture techniques have recently been employed<sup>32,33</sup>,  
10 but the intensity modulation with a small transmission ratio leads to low light efficiency  
11 and loses the robustness and flexibility of segmented apertures. Previous methods  
12 utilizing scanning schemes<sup>34,35</sup> enhance the resolution of perspective views to some  
13 extent, but they are still far from the diffraction limit of the whole objective's NA in 3D  
14 reconstruction. With the high-resolution multiplexed phase-space measurements captured  
15 by DAOSLIMIT, we can apply the deconvolution algorithm for incoherent diffraction-  
16 limited 3D synthetic aperture, which is impossible for traditional LFM (Supplementary  
17 Note 2 and Extended Data Fig. 3).

18 Meanwhile, despite many investigations of the computational phase modulation  
19 capability with phase-space measurements, their applications are still limited in low-  
20 resolution extended depth of field<sup>36</sup> and digital refocusing<sup>11</sup>. In particular, the unique  
21 advantage of phase-space measurements in wavefront correction has rarely been  
22 recognized, since the image degradation from the aberration is often concealed by the  
23 reduced resolution of traditional phase-space synthesis. However, with our diffraction-  
24 limited incoherent synthetic aperture capability, we fully exploit the power of  
25 computational phase modulation in post-processing, which is called digital adaptive

1 optics (DAO). Without using a deformable mirror<sup>20</sup> or spatial light modulator (SLM)<sup>22</sup> as  
2 in traditional AO, we computationally apply multi-site aberration corrections to further  
3 enhance the resolution and SNR (Supplementary Note 3).

4 For high-speed 3D fluorescence imaging as shown in Fig. 2a, rather than the axial  
5 scanning by normal wide-field fluorescence microscopy (WFM), DAOSLIMIT captures  
6 the 3D signals along multiple elongated PSFs without any optical loss by lateral scanning  
7 (Fig. 2a). To realize diffraction-limited 3D incoherent synthetic aperture and DAO  
8 together, we develop an algorithm, termed mutual iterative tomography, that incorporates  
9 both the iterative wavefront estimation and volume reconstruction with digital correction  
10 together, by the alternating direction multipliers (ADMM) method<sup>37</sup> (Supplementary  
11 Note 4 and Extended Data Fig. 2). Even with a larger input data size due to the higher  
12 resolution of phase-space measurements, we get similar convergence speed to the  
13 traditional 3D deconvolution algorithm but retrieve much more effective voxels (at least  
14 30 times, Extended Data Fig. 5a, b).

15 To quantitatively evaluate the resolution after reconstruction, we imaged 100-nm-  
16 diameter fluorescence beads distributed in 1% agarose with a high-NA objective  
17 (63×/1.4-NA) by traditional LFM, sLFM without DAO and DAOSLIMIT. For beads at  
18 different axial positions, we calculated the resolution by measuring the full width at half-  
19 maximum (FWHMs) of the lateral and axial profiles after Gaussian fit (Fig. 2b). With  
20 approximately 92% spatial overlap, sLFM achieves around three-fold improvement on  
21 average in both lateral and axial resolution, compared with traditional LFM. With DAO,  
22 the resolution can be further enhanced by correcting the spatially nonuniform aberrations,  
23 which are hard to recognize in traditional LFM due to resolution loss (Fig. 2c-f).  
24 Traditional LFM has a significant resolution drop close to the native object plane, as a  
25 trade-off for a larger depth of field, which is hard to bypass due to the resolution limitation  
26 in multiplexed phase space<sup>17</sup>. In contrast, our DAOSLIMIT has a much smoother curve



1 with an even larger depth of field. Both the lateral and axial resolutions reach the  
2 diffraction limit around the native object plane (250 nm and 320 nm, respectively) and  
3 maintain similar performance over a large axial distance ( $\sim 10 \mu\text{m}$ ). The slight super-  
4 resolution capability in the axial domain close to the focal plane is mainly due to the  
5 higher angular sensitivity and deconvolution process, which is identical to the previous  
6 study with even smaller angular resolution<sup>38</sup>. In addition, we tested the influence of  
7 different overlap ratios in the spatial domain and found that a similar performance can be  
8 achieved with only 67% spatial overlap, corresponding to  $3 \times 3$  lateral shifts (Extended  
9 Data Fig. 6a, b), which is much smaller than the number of reconstructed axial planes  
10 ( $>100$ ). Such data compression in a physics model reduces the sampling points required  
11 for 3D imaging, benefiting from the repeated usage of every pixel in phase space at  
12 different axial planes with the prior of linear beam propagation.

## 1 **Enhanced SNR for high-speed, high-resolution 3D fluorescence imaging**

2 Rather than acquiring the focal stack in WFM with limited depth of field for each focal  
3 plane, DAOSLIMIT significantly improves the SNR by multiplexing different axial  
4 planes effectively along various sub-aperture PSFs, which stay focused within the  
5 extended depth of field<sup>25</sup>. To verify the SNR enhancement, we imaged HeLa cells labelled  
6 with GFP on the actin and DAPI on the nuclei, by DAOSLIMIT and WFM (Fig. 3). Every  
7 image of the WFM (first) and DAOSLIMIT (later) was captured sequentially with the  
8 same excitation power and exposure time for a fair comparison. A small region was  
9 cropped out with 4 cells for detailed analysis. Low excitation power (Supplementary  
10 Table 1) was utilized to create a low-SNR condition and avoid photobleaching. The  
11 orthogonal maximum intensity projections (MIPs) across 16- $\mu\text{m}$ -thick slabs of the focal  
12 stack acquired by WFM, including 90 axial slices at 200-nm steps (corresponding to 4.5  
13 s total exposure time), show strong background fluorescence and great shot noise with  
14 extremely low contrast in the  $x$ - $z$  and  $y$ - $z$  planes (Fig. 3a). Employing 3D Richardson-  
15 Lucy (RL) deconvolution<sup>39</sup>, we significantly enhance the contrast and SNR with the 3D  
16 wide-field PSF incorporating the photons from 90 images, which can be clearly observed  
17 from its Fourier transform (Fig. 3b). Fewer images used for WFM decrease the SNR and  
18 resolution, as shown in Extended Data Fig. 7a-d. Conventional LFM obtains the 3D  
19 information in a snapshot at the expense of spatial resolution (Fig. 3c), with some  
20 reconstruction artefacts close to the native objective plane<sup>25</sup>. Our DAOSLIMIT pushes  
21 the resolution to the diffraction limit with much higher SNR and contrast than other  
22 methods (Fig. 3d), and only 9 images are used here for reconstruction (10 times less than  
23 WFM). Similar subcellular structures can be observed in both Figs. 3b and d, while the  
24 DAOSLIMIT results show even better axial resolution with much less noise.

25 Such a huge SNR improvement brought by the better 3D sampling strategy is essential  
26 for high-speed 3D fluorescence imaging<sup>10</sup>. We also compared the results of DAOSLIMIT

1 with different spatial overlap ratios (Extended Data Fig. 7e, f), illustrating that spatial  
2 overlap larger than 67% offers little resolution enhancement. The ratio threshold is  
3 consistent with our results in resolution characterization and is similar to other  
4 ptychographic methods for aperture synthesis<sup>26</sup>. In addition, we demonstrated several  
5 comparisons with both commercial spinning disk confocal microscopy and light-sheet  
6 microscopy. The results show that we achieve much higher SNR at similar speeds with  
7 low photobleaching, whereas other techniques degrade quickly without AO, especially  
8 for low-scattering samples (Extended Data Fig. 8a). For transparent areas (Extended Data  
9 Fig. 8b), DAOSLIMIT retains similar resolution and contrast to light-sheet microscopy  
10 at much higher speed with uniform performance across a large field of view (FOV). The  
11 orders-of-magnitude improvement means that we can either image at higher speed with  
12 the same duration, or image for much longer durations at the same speed as conventional  
13 methods with significantly less phototoxicity.

## 1 **Aberration-free 3D observation of mitochondrial dynamics at the millisecond scale**

2           With superior spatiotemporal resolution and multi-site AO capability, we can  
3 observe large-scale organelle dynamics in 3D at the millisecond scale without aberration.  
4 For demonstration, we imaged 3D mitochondrial dynamics in dorsal root ganglion (DRG)  
5 neurons of mice across a large volume. The colour-coded MIPs of the reconstructed 3D  
6 volumes with and without DAO are shown in Figs. 4a and b, respectively. Due to the  
7 large size of the DRG neuron cell body and high NA of the objective, there are large  
8 aberrations and consequent image contrast degradation, especially for the mitochondria  
9 close to the nuclei, whose refractive index is much higher than the cytoplasm. In contrast,  
10 DAO achieves significant improvement in SNR and resolution with uniform performance  
11 across a large FOV by multi-site DAO (Fig. 4c). A typical region is selected to be viewed  
12 across 2- $\mu\text{m}$ -thick slabs perpendicular to the detection axis ( $xy$ ; left panels in Fig. 4d, e)  
13 or parallel ( $yz$ ; right panels in Fig. 4d, e). For example, the white arrow in Fig. 4e indicates  
14 a ring structure that cannot be recognized in Fig. 4d due to aberration. Substantial  
15 improvement can be observed after tiled wavefront correction in both the  $x$ - $y$  and  $y$ - $z$   
16 planes, with the correction wavefront marked on the upper-right corner. The cross-section  
17 profiles indicate a qualitative evaluation of diffraction-limited performance after DAO to  
18 distinguish two mitochondria with an extremely small interval. With the interleaved  
19 reconstruction, recently used in structured illumination microscopy (SIM)<sup>40,41</sup>, the  
20 imaging speed is approximately 17 volumes per second. Limited by the sensor pixel  
21 number (Andor Zyla 4.2 plus), each volume contains  $\sim 2048 \times 2048 \times 81$  voxels, which  
22 is further cropped to the regions of interest for better visualization. As shown in  
23 Supplementary Video 1, large-scale various mitochondrial dynamics, such as fast  
24 movements (Fig. 4f) and fusion (Fig. 4g), can be clearly observed in 3D, with  
25 millisecond-scale temporal resolution and diffraction-limited spatial resolution. For a  
26 quantitative analysis, we applied a commercial tracking algorithm to the reconstructed  
27 3D videos with and without DAO, and the 2D video of one axial plane in the middle with

1 DAO (Fig. 4h). With the high-resolution high-speed 3D data reconstructed by  
2 DAOSLIMIT, more mitochondria can be tracked with longer tracking lengths. In  
3 addition, we observe a remarkable increase in average speed in 3D data, compared with  
4 the 2D data, because the projection from 3D to 2D reduces the amplitude of the speed  
5 vector. Thus, both the high-speed 3D imaging capability and real-time multi-site DAO  
6 are essential for robust and accurate tracking analysis of organelle dynamics.

## 1 ***In vivo* imaging of vesicle and membrane dynamics during embryogenesis**

2 To show the unprecedented imaging performance *in vivo*, we imaged various dynamics  
3 of vesicles and membranes in zebrafish embryos at the gastrulation stage. First, a  
4 comparison in Fig. 5a demonstrates that the resolution and contrast degradations of WFM  
5 in multicellular organisms can be successfully resolved by DAOSLIMIT with much  
6 fewer images required.

7 The temporal resolution sacrificed by lateral scanning can be further compensated  
8 by exploiting the low-rank sparsity in time-lapse (4D) data<sup>40,41</sup>. Unlike SIM with only  
9 part of the frequency domain captured for one shot, every frame of DAOSLIMIT has all  
10 the frequency information for the volume reconstruction with different periodic sparse  
11 sampling patterns in the spatial domain (Extended Data Fig. 3). In addition to such  
12 spectral-spatial data redundancy for synthesis, the reconstruction of the time-lapse data is  
13 regarded as a whole by utilizing the volume obtained from former time stamps as the  
14 initial sample prior for the current frame. To achieve uniform performance across the  
15 whole timeline, we updated the volume in a time-loop way with temporal continuity,  
16 similar to running a movie forward and backward again. Then, only 2 iterations are  
17 required for each volume and the SNR can be further enhanced by incorporating the  
18 information of all the frames. With interleaved reconstruction, we can push the speed of  
19 high-resolution large-scale 3D fluorescence imaging to the camera frame rates with  
20 extremely high SNR. A 100 Hz 3D imaging of vesicle dynamics and potential vesicle  
21 trafficking in one zebrafish epithelial cell at the gastrulation stage was demonstrated to  
22 show its superior performance (Fig. 5b and Supplementary Video 2). The high  
23 spatiotemporal resolution facilitates high-fidelity 3D tracking of large-scale vesicles in a  
24 single cell with a large variance in speed from 0.2  $\mu\text{m/s}$  to 10  $\mu\text{m/s}$ . Our DAO capability  
25 provides strong robustness to optical aberrations and keeps diffraction-limited  
26 performance in multicellular organisms, while the time-loop algorithm further enhances

1 the SNR and contrast with reduced computational costs. Figure 5c (Supplementary Video  
2 3) shows a typical example deep inside the zebrafish embryo. Different colours represent  
3 different axial positions in the colour-coded MIPs. The dynamic filopodia retraction  
4 processes can be observed in Figs. 5e, and g (Supplementary Video 4). A cell division  
5 process (Fig. 5f) happened nearby and showed gradual membrane enrichment dynamics  
6 at the boundary of daughter cells. However, for samples with high-speed movement or  
7 intensity changes, the interleaved reconstruction only brings motion blur (Fig. 5d) or  
8 reconstruction artefacts (Extended Data Fig. 9). To effectively improve the temporal  
9 resolution, we develop a time-weighted algorithm by applying different weights to the  
10 sequentially captured light field images in the pre-processing step for high-resolution  
11 phase space. Orthogonal MIPs across 5- $\mu$ m-thick slabs of the selected area in Fig. 5c are  
12 displayed to show the effectiveness of the time-weighted algorithm. The motion blur and  
13 artefacts of a fast-moving vesicle (white arrow) can be eliminated, and the surrounding  
14 structures are consistent without any resolution reduction. We further tested the time-  
15 weighted algorithm by imaging the histone-labelled *C. elegans*, which was highly  
16 dynamic and had obvious motion artefacts. With our time-weighted algorithm, little  
17 artefacts can be observed with clear 3D structures of histone in the nucleus (Extended  
18 Data Fig. 9 and Supplementary Video 5), which paves the way to study large-scale  
19 genome structure dynamics *in vivo*.

20 With both the time-loop and time-weighted algorithms, the migrasome dynamics  
21 and the migration process of a cell in 3D can be observed clearly at 10 Hz in Fig. 5h  
22 (Supplementary Video 6). We can also capture high-speed fluctuations of filopodia  
23 membrane (Fig. 5i, Extended Data Fig. 10 and Supplementary Video 7), including both  
24 fast filopodia retraction processes and 3D migrasome movements (Supplementary Video  
25 7). High-speed 3D tracking can then be employed to analyse the motion patterns. Such  
26 experiments provide the high-throughput 4D data required for investigating cell-cell  
27 communications at the organelle level.

### 1 **3D calcium propagation at subcellular resolution both *in vitro* and *in vivo***

2 Observing 3D calcium propagation at sub-cellular resolution *in vivo* has long been a  
3 pursuit in neuroscience<sup>42</sup>. Our DAOSLIMIT pushes the spatiotemporal resolution in  
4 multicellular organisms to a new stage, with orders-of-magnitude improvement, which  
5 provides a way to investigate the subcellular calcium dynamics both *in vitro* and *in vivo*.  
6 With the superior performance, cultured cardiomyocytes labelled with Fluo-8 were  
7 imaged at 100 Hz to show the 3D calcium propagation within a single cell (Extended  
8 Data Fig. 11 and Supplementary Video 8). For more challenging cases with large  
9 aberrations, we imaged the spontaneous calcium propagation in a human 3D cerebral  
10 organoid<sup>43</sup> infected with the GCamp6s indicator at 30 Hz (Fig. 6a and Supplementary  
11 Video 9). We can clearly visualize the 3D calcium wave evoked from the intersection of  
12 two neurons, based on the temporal-coded MIP for start time, with different colours  
13 representing the time points when the calcium response ( $\Delta F/F_0$ ) reaches 10% of the  
14 maximum intensity (Fig. 6b). Unlike the calcium increase in one neuron, a small local  
15 calcium reduction occurring in an adjacent neuron can be readily observed (Fig. 6e). In  
16 addition, with high speed, we can resolve the difference in rise time when the calcium  
17 intensity increases from 20% to 80% of the maximum intensity along the dendrite (Fig.  
18 6c). The orthogonal MIPs of the selected area in Fig. 6a at different time stamps are shown  
19 in Fig. 6d. The temporal traces at the labelled regions of interest (ROIs) illustrate the  
20 diversity of calcium dynamics within a single neuron (Fig. 6e).

21 For *in vivo* experiments, we conducted 3D calcium imaging of a cluster of five Cho  
22 neurons (*lch5*) in an awake *Drosophila* larva with sound stimulation<sup>44</sup>. Strong aberrations  
23 and fast movements of the larval body make it extremely difficult to record the neural  
24 activities at sub-cellular resolution in 3D. However, with DAOSLIMIT, we can easily  
25 obtain high-resolution 3D videos covering the whole Cho neuron at 100 Hz with  
26 sufficient SNR for detailed analysis (Fig. 6f and Supplementary Video 10). When we



1 applied the 500 Hz sound stimulus (with the red arrow in Fig. 6i indicating the time point  
2 at which we started the stimulus), strong calcium responses showed up. The temporally  
3 coded MIP for start time illustrates that the speed of the calcium propagation varies a lot  
4 even on a same dendrite (Fig. 6g). In addition, a large variance of the rise time occurred  
5 in different parts of the lch5 neurons (Fig. 6h), which can also be observed in the temporal  
6 traces of the ROIs labelled in Fig. 6f. The zoomed-in orthogonal MIPs of the selected  
7 area in Fig. 6f at different time stamps are shown in Fig. 6j. With DAOSLMIT, more and  
8 more *in vivo* subcellular dynamics can be investigated in their native state across a large  
9 FOV with millisecond-scale temporal resolution.

## 1 **Discussion**

2 We have demonstrated a highly efficient and compact microscopic imaging method to  
3 obtain aberration-free 3D fluorescence imaging at ultrahigh spatiotemporal resolution,  
4 termed digital adaptive optics scanning lightfield mutual iterative tomography  
5 (DAOSLIMIT). By multiplexing multiple spatial modes in a ptychographic way, we  
6 fundamentally solve the trade-off between the angular and spatial resolution in LFM.  
7 Such resolution promotion facilitates various computational imaging techniques such as  
8 3D incoherent synthetic aperture and digital adaptive optics in fluorescence imaging,  
9 which, to the best of our knowledge, have never been realized before. With these unique  
10 capabilities, we achieve the first millisecond-scale aberration-free 3D fluorescence  
11 imaging at diffraction-limited resolution across a large volume *in vivo*, featuring over 15  
12 Giga-voxels per second by data compression in the imaging side.

13 For WFM without aberration, every image has diffraction-limited resolution  
14 within the depth of focus. This traditional imaging scheme is extremely efficient for two-  
15 dimensional imaging with high resolution and contrast, although it does not work as well  
16 for 3D data sampling. Every slice in the focal stack has a small axial range with limited  
17 valid photons for 3D deconvolution. In contrast, sLFM keeps the PSF focused within the  
18 extended depth of field to avoid 3D information being flooded in the shot noise of the  
19 out-of-focus fluorescence, which is also a common benefit for PSF engineering in super-  
20 resolution techniques<sup>45</sup>. The photons from the 3D sample are then collected effectively in  
21 a tomographic way with robustness to scattering and aberrations benefitting from the low  
22 NA of the sub-aperture PSF. In addition, the scanning process, akin to ptychography,  
23 provides a strong constraint in the spatial domain for multiple state unmixing<sup>46</sup>. In  
24 addition to the efficient multiplexing mechanism, the repeated usage of high-resolution  
25 phase-space measurements in the aperture synthesis at different depths greatly reduces  
26 the required sampling points for a large volume, based on the assumption that the beams

1 follow the propagation model within the depth of field<sup>27</sup>. The combination patterns are  
2 optimized by the DAO algorithm to get rid of the optical aberrations in a complicated  
3 environment and to reach the whole-NA resolution of the objective. The higher efficiency  
4 in both sampling and reconstruction, as well as the aberration-free capability with DAO  
5 significantly increase the SNR and the resolution of sLFM, compared with traditional  
6 WFM in multicellular organisms. Consequently, we believe such improvements in both  
7 SNR and spatiotemporal resolution will revolutionize the analysis and imaging  
8 techniques in various applications such as cell interactions in immune responses, cellular  
9 vesicular transport and high-speed 3D observation of calcium activity.

10 With DAOSLIMIT, we demonstrate fast aberration-free 3D volumetric imaging  
11 at diffraction-limited resolution, in a variety of biological specimens such as  
12 mitochondrial dynamics in live cells, vesicles and membrane dynamics in zebrafish  
13 embryos, and calcium propagation in human 3D cerebral organoids and *Drosophila* larval  
14 neurons. The capability of our DAOSLIMIT, working as a compact add-on to WFM, can  
15 be further exploited in multiple aspects. With diffraction-limited performance in  
16 multicellular organisms, structured illumination techniques<sup>4,6</sup> can be incorporated to  
17 realize high-speed 3D super-resolution imaging *in vivo*. Moreover, different priors in  
18 spatial and temporal domains or the recently boomed deep learning techniques can be  
19 further associated with our technique for better performance. More generally,  
20 DAOSLIMIT can be extended to other aberration-sensitive imaging modalities such as  
21 gigapixel photography or X-ray computational tomography, to greatly improve their  
22 resolution, depth of field, and imaging speed simultaneously.

## 1 **Methods**

2 **Experimental setup and imaging conditions.** The DAOSLIMIT system works as an  
3 add-on to an inverted epifluorescence microscope (Zeiss, Observer Z1) equipped with a  
4 Metal Halide Lamp for fluorescence excitation. We used a 10×/0.45NA dry objective  
5 (Zeiss Apochromat) and a 10×/0.3NA phase objective (Zeiss Apochromat) for the USAF-  
6 1951 resolution chart, whereas all the biological experiments were performed with a  
7 63×/1.4-NA oil objective (Zeiss Apochromat). A metal mask with a hollow ring is  
8 inserted at the pupil plane of the excitation path to reduce background fluorescence with  
9 a highly-inclined illumination<sup>47</sup>. The inner diameter and the outer diameter are chosen as  
10 9 mm and 10mm, respectively, for the 63×/1.4-NA objective to excite a relatively-large  
11 volume covering the whole FOV (Extended Data Fig. 1). For the detection path, a 1.6×  
12 Optovar is chosen to get a further magnification of the image, which is then exported to  
13 the right-side image port of the microscope. We use a two-dimensional galvo-scanning  
14 system with a relay system between them to scan the image plane at both high speed and  
15 high precision. A microlens array with 100- $\mu\text{m}$  pitch size and 2.1-mm effective focal  
16 length is then inserted at the conjugate image plane. Its NA (F-# 21) is slightly larger than  
17 the NA of the image plane to prevent spectrum leakage<sup>11</sup>. Another 4f system relays the  
18 back focal plane of the microlens array to the sCMOS camera (Andor Zyla 4.2 plus, 2,048  
19  $\times$  2,048 pixels) with a magnification of 0.845, so that each microlens covers  $13 \times 13$   
20 sensor pixels, corresponding to  $1.43 \mu\text{m} \times 1.43 \mu\text{m}$  area at the sample plane for the 63×  
21 objective. All the relay systems are custom-designed with off-the-shelf lenses to achieve  
22 diffraction-limited performance. Detailed imaging and reconstruction conditions for all  
23 fluorescence experiments in the paper, including excitation power, exposure time, frame  
24 rate, voxel sizes, fluorophores, proteins, and filter sets, are illustrated in Supplementary  
25 Table 1.

1 **Mutual iterative tomography with DAO.** The volume reconstruction process can be  
2 viewed as an inverse tomographic problem along different angular PSFs<sup>48</sup>. Different from  
3 previous 3D RL deconvolution algorithm for LFM<sup>25</sup>, we model the problem in the 4D  
4 multiplexed phase space with details given in Supplementary Note 1 and Extended Data  
5 Fig. 2. The 4D PSF has several advantages over traditional 3D PSF including the spatial-  
6 invariance property and smooth distributions, which make the deconvolution process  
7 more efficient and robust.

8 The pipeline of the mutual iterative tomography algorithm is shown in Extended  
9 Data Fig. 4. For all the raw data recorded by the sensor, we first cropped the images to  
10 regions of interest (ROIs) with matched edges with the microlens. Then a pre-processing  
11 process was applied to realign the pixels in 4D multiplexed phase space. Pixels located at  
12 the same position relative to the centre of each microlens, in different sequentially-  
13 scanned images, were aligned together as a specific spatial frequency component. Before  
14 iterative updates, the realigned multiplexed phase-space data were up-sampled with a  
15 cubic interpolation as the input for reconstruction. To solve the optimization problem of  
16 3D reconstruction with aberration estimation, we adopted the ADMM method<sup>37</sup>. Details  
17 of the algorithm are described in Supplementary Note 4.

18 **Time-lapse video reconstruction with time-loop and time-weighted algorithms.** For  
19 time-lapse video, we recognized the reconstruction of the 4D information (the time-lapse  
20 3D video) as a whole to make full use of the temporal continuity for SNR enhancement.  
21 An interleaved reconstruction process<sup>40</sup> was applied to retrieve the temporal resolution  
22 sacrificed by the periodically scanning process (e.g.  $3 \times 3$  lateral shifts by galvo). And we  
23 replaced the uniform initial value with the average of the uniform initial value and the  
24 reconstructed result of the previous frame, which could greatly accelerate the  
25 convergence. To get rid of the nonuniform performance with the increase of the frame  
26 number, we first updated the volumes with the evolution over time, and kept updating

1 from the last frame to the first frame in the inverse direction, as a movie played back. We  
2 call such process the time-loop algorithm, which incorporates all the video information  
3 for every volume update and greatly improves the SNR due to the large redundancy in  
4 the 4D video. With only two iterations required for each volume at one time stamp, we  
5 can obtain the continuous 4D data at extremely high spatiotemporal resolution (Fig. 5c  
6 and Supplementary Video 3).

7 For samples with high-speed movements or flashing, we applied a time-weighted  
8 algorithm for pre-processing during the pixel realignment to alleviate motion blur (Fig.  
9 5d and Supplementary Video 3) and artifacts (Extended Data Fig. 9 and Supplementary  
10 Video 5). For example, if we use 9 images to reconstruct a volume with 67% spatial  
11 overlap, images close to the middle time stamp will have higher weights during the up-  
12 sampling interpolation process. The time-weighted phase-space were then used as input  
13 for time-loop reconstructions described before, which can successfully reduce the motion  
14 blur as shown in Fig. 5d, indicating an effective improvement in the temporal resolution  
15 after interleaved reconstruction.

16 **Cell culture and slice preparation.** Animal materials were collected in accordance with  
17 a protocol approved by the Institutional Animal Care and Use Committee of Tsinghua  
18 University.

19 HeLa cells were maintained in DMEM medium supplemented with 10% FBS, 1%  
20 Pen-Strep antibiotics and 1% NEAA (all from GIBCO) at 37 °C in a 5% CO<sub>2</sub> incubator.  
21 2 days before imaging, HeLa cells were seeded on the #1.5 Φ12 mm round cover glass  
22 (Fisher Scientific) at a density of 4000 cells per coverslip, then transfected by Cell  
23 Light™ GFP-actin reagents (Invitrogen). Upon imaging, cells were fixed in 4%  
24 paraformaldehyde (Sigma), washed by PBS and mounted by AntiFade mounting medium  
25 (containing 2 μg/mL DAPI, Invitrogen).

1           The cardiomyocytes were isolated from neonatal rats, and all the procedures were  
2 reviewed and approved by the Institutional Animal Care and Use Committee office of  
3 Tsinghua University. Briefly, rat ventricles were freshly isolated and minced into small  
4 pieces (0.5-1 mm<sup>3</sup>), washed with cold HBSS and digested in 200 U/mL Collagenase II  
5 (Worthington Biochemical Corporation) and 0.1% Trypsin (GIBCO) at 37 °C for 1h on  
6 the cell rotor, then neutralized by adding same volume of DMEM medium supplemented  
7 with 10% FBS (GIBCO). After filtered by 40 μm cell strainer (Falcon), cells were  
8 cultured in full DMEM medium for 2 h to remove the fibroblast and endothelial cells.  
9 The supernatant was centrifuged and cardiomyocytes were seeded on the #1.5 Φ12 mm  
10 round cover glass (Fisher Scientific) at the density of 6000 cells per coverslip, maintained  
11 at 37 °C in a 5% CO<sub>2</sub> incubator. After 4 days, cells were washed by HBSS, stained with  
12 2 μM Fluo-8 AM (AAT Bioquest) for 30 min, washed and imaged in HBSS at 37 °C.

13           For high-speed 3D imaging of mitochondrial dynamics, dorsal root ganglion  
14 neurons were trimmed and isolated from postnatal 8-10 day SD rat spinal cords in HBSS  
15 (Invitrogen), and digested in 2.5 U/ml dispase II (Roche) and 200 U/ml collagenase  
16 (Worthington Biochemical Corporation) at 37 °C for 30 min and then shaking on the cell  
17 rotor at 30 °C for 30 min. After a brief spin down, dissociate neurons were collected  
18 through 70-μm cell strainer (Falcon). For mitochondria labeling, 5×10<sup>4</sup>-1×10<sup>5</sup> fresh  
19 isolated DRG neurons were transfected with 0.5 μg Mito-GFP for Nucleofector (Lonza)  
20 SCN Basic Neuro Program 6 with Amaxa Basic Neuron SCN nucleofector Kit, then  
21 seeded on 25 μg/ml Poly-ornithine (Sigma-Aldrich) and 5 μg/ml Laminin (Roche) pre-  
22 coated #1.5 Φ12 mm round cover glass (Fisher Scientific) at a density of 6000 cells per  
23 coverslip. After electroporation, neurons were maintained in Neurobasal A medium with  
24 2% B27 supplements, 2mM GlutaMAX and 2% FBS (Invitrogen) for 48 h or 72 h at  
25 37 °C in a 5% CO<sub>2</sub> incubator before imaging.

1 **C. elegans experiments.** The H2B::GFP strain AZ212 was kindly provided by Prof.  
2 Guangshuo Ou (Tsinghua University) as a gift and maintained on nematode growth  
3 medium (NGM) plates seeded with *E. coli* OP50 at 20°C following standard protocols.  
4 Live worm was imaged according to the previously described protocol<sup>49</sup>. Briefly, L1  
5 larval worms were anesthetized with 1 mg/ml levamisole in M9 buffer and mounted on  
6 3% agarose pads at 20°C. After immobilization, worms were imaged subsequently with  
7 our system.

8 **Zebrafish embryos experiments.** Wild type (Tuebingen strain) zebrafish were used in  
9 this study with ethical approval from the Animal Care and Use Committee of Tsinghua  
10 University. The zebrafish embryos were injected with 300pg *tspan4a-EGFP* mRNA  
11 (synthesized *in vitro* with mMessage mMachine T7 kit (AM1344, Ambion) in one cell at  
12 the 16-cell stage (1.5hpf). At 70% epiboly stage (8hpf), injected embryos were embedded  
13 in 1% low-melting-point agarose in glass bottom dishes (D35-14-0-N, In Vitro Scientific)  
14 for live imaging. Fertilized zebrafish embryos were kept at 28.5°C in Holtfreter's solution  
15 (NaCl 59 mM, KCl 0.67 mM, CaCl<sub>2</sub> 0.76 mM, NaHCO<sub>3</sub> 2.4 mM).

16 For the preparation of the fixed Zebrafish zebrafish gastrula used in Extended Data Fig.  
17 8, 16-cell stage embryos were injected with about 300pg *tspan4a-GFP* mRNA in one cell.  
18 When embryos reached 70%-80% epiboly stage (7-8 hours post fertilization), we  
19 removed the chorion. -20 °C methanol was used to fix and dehydrate embryos overnight.  
20 The embryos were rehydrated by graded 0.5% PBST (Triton-X 100 Solarbio 524A0513)  
21 and then incubated in block solution (1% BSA, 0.3M glycine and 10% goat serum in 0.5%  
22 PBST) for 1 hour at room temperature. Embryos were then incubated overnight with  
23 primary antibody (chick anti-GFP (Abcam, ab13970)), which is diluted 1:50 in block  
24 solution at 4 °C. To remove the primary antibody, embryos were then washed in 0.5%  
25 PBST for 3×1 hour at room temperature and incubated in secondary antibody (anti-chick  
26 488 (Abcam, ab150169)) diluted 1:200 in block solution overnight at 4 °C. To remove



1 the secondary antibody, embryos were washed with 0.5% PBST for 3×1 hour at room  
2 temperature. Finally, the embryos were mounted in 1% low-melting-point agarose for  
3 imaging by DAOSLIMIT and the spinning-disk confocal microscope, respectively. The  
4 embryos were mounted directly for imaging by the light-sheet microscope.

5 **Human 3D cerebral organoids experiment.** Human induced pluripotent stem cells  
6 (hiPSCs) DYR0100 were kindly provided by Stem Cell Bank, Chinese Academy of  
7 Sciences. Neural progenitor cells (NPCs) were differentiated from DYR0100 by Hopstem  
8 Bioengineering Ltd. Co following the differentiation method described previously<sup>43</sup>.  
9 Human 3D cerebral organoids were generated and maintained in human 3D cerebral  
10 organoids medium (Cat # HopCell-3DM-001, Hopstem Bioengineering) by Hopstem  
11 Bioengineering according to the manufacturer's protocols. For calcium imaging, human  
12 3D cerebral organoids were infected with lentivirus carrying rLV-EF1 $\alpha$ -GCamp6s-  
13 WPRE (provided by BrainVTA) and returned to 37°C CO<sub>2</sub> incubator for 1 week. After  
14 that, cerebral organoids were transferred to imaging chamber in calcium imaging buffer  
15 (150mM NaCl, 4mM KCl, 10mM HEPES, 10mM Glucose).

16 **Drosophila larvae experiments.** The ChAT-Gal4 line (56500), UAS-TdTom (36328)  
17 and 20XUAS-IVS-jGCaMP7s line (79032) were obtained from the Bloomington Stock  
18 Center. Animals were raised at 25 °C in an incubator with a 12-h light/dark cycle and  
19 humidity control at 70%. *In vivo* calcium imaging of larval Cho neurons was performed  
20 with third instar larvae according to previously described protocols<sup>44</sup>. During imaging of  
21 DAOSLIMIT, a freely moving larva was pressed between two coverslips with a drop of  
22 distilled water to reduce its movement. The calcium indicator jGCaMP7s was used to  
23 measure the calcium signal.

24 **Data analysis.** All the data analyses were done with customized Matlab (Mathworks,  
25 Matlab 2018) programs, Imaris 9.3 (Oxford Instruments) and Huygens. All the tracking

1 results were done by Imaris with the same parameters for fair comparison. The 3D  
2 deconvolutions of the commercial light-sheet microscope and the spinning disk confocal  
3 microscope were done with Huygens. The temporal traces of calcium response are  
4 calculated by  $\Delta F/F_0 = (F - F_0)/F_0$ , where  $F_0$  is the mean fluorescence intensity of the first  
5 20 volumes. For all the colour-coded MIPs, we mapped the maximum intensity and its  
6 axial position to the value and hue in HSV colour space, respectively. For the temporal-  
7 coded MIPs, we firstly mapped the start time or rise time of each voxel to hue in HSV  
8 colour space, and then used the standard deviation of each voxel as the intensity for MIP  
9 calculation.

#### 10 **Data availability**

11 All relevant data are available from the corresponding authors upon reasonable request.

12

#### 13 **Code availability**

14 The codes for the reconstruction and analyses described in this paper are available from  
15 the corresponding author upon reasonable request.

16

#### 17 **Acknowledgements**

18 We thank Guangshuo Ou and Hao Zhu for their assistance in *C. elegans* preparation, Li  
19 Yu and Dong Jiang for their assistance in Zebrafish embryo preparation, Wei Zhang and  
20 Yinjun Jia for their assistance in *Drosophila* larvae preparation, and Dan Zhang (Core  
21 Facility, Centre of Biomedical Analysis, Tsinghua University) for technical support with  
22 light-sheet microscopy. We would like to acknowledge the assistance of the Imaging Core  
23 Facility, Technology Centre for Protein Sciences, Tsinghua University, for assistance  
24 with Imaris 9.3 and Huygens. This work is supported by the National Natural Science  
25 Foundation of China (61327902, 61722209, 61729501, 61722209, and 61671265), the  
26 Beijing Municipal Science and Technology Commission (Z181100003118014), and the  
27 Natural Science Foundation of Beijing (18JQ019 and 7192103).

28

#### 29 **Contributions**

1 Q.D., and J.W. conceived and designed the project. J.W., J.F. and Z.L. designed and built  
2 the optical system. P.X. and J.W. designed the biological experiments. J.W., Z.L. and  
3 H.Q. conducted the numerical simulation and developed the reconstruction algorithm.  
4 T.Y. conducted the hardware synchronization. X.Z. and B.Z. performed cell cultures. Z.J.  
5 prepared the zebrafish embryos. Z.L., J.W., K.Z., X.L., T.Y., G.Z. and Z.J. conducted  
6 most biological experiments, data capturing and volume reconstruction. X.L. and L.F.  
7 conducted performance optimization on the algorithms. H.X. and J.F. conducted  
8 calibration and optimization of imaging setups. J.W., Z.L., J.F., P.X. and Q.D. prepared  
9 figures and wrote the manuscript with input from all authors.

10

### 11 **Competing interests**

12 The authors declare the following competing interests: Q.D., J.W. and Z.L. hold patents  
13 on technologies related to the devices developed in this work

14

### 15 **Materials & Correspondence**

16 Correspondence and requests for materials should be addressed to  
17 [qhdai@tsinghua.edu.cn](mailto:qhdai@tsinghua.edu.cn) (Q.D.), [xipeng@pku.edu.cn](mailto:xipeng@pku.edu.cn) (P.X.), and  
18 [fanjingtao@mail.tsinghua.edu.cn](mailto:fanjingtao@mail.tsinghua.edu.cn) (J.F.).

19

## 1   **References**

- 2   1.   Pantazis, P. & Supatto, W. Advances in whole-embryo imaging: A quantitative  
3       transition is underway. *Nat. Rev. Mol. Cell Biol.* **15**, 327–339 (2014).
- 4   2.   Liu, T.-L. *et al.* Observing the cell in its native state: Imaging subcellular dynamics  
5       in multicellular organisms. *Science* **360**, eaaq1392 (2018).
- 6   3.   Schulz, O. *et al.* Resolution doubling in fluorescence microscopy with confocal  
7       spinning-disk image scanning microscopy. *Proc. Natl. Acad. Sci. U.S.A.* **110**,  
8       21000–21005 (2013).
- 9   4.   York, A. G. *et al.* Resolution doubling in live, multicellular organisms via  
10      multifocal structured illumination microscopy. *Nat. Methods.* **9**, 749–754 (2012).
- 11  5.   Schermelleh, L. *et al.* Subdiffraction Multicolor Imaging of the Nuclear Periphery  
12      with 3D Structured Illumination Microscopy. *Science* **320**, 1332–1336 (2008).
- 13  6.   Mertz, J. Optical sectioning microscopy with planar or structured illumination. *Nat.*  
14      *Methods.* **8**, 811–819 (2011).
- 15  7.   Ahrens, M. B., Orger, M. B., Robson, D. N., Li, J. M. & Keller, P. J. Whole-brain  
16      functional imaging at cellular resolution using light-sheet microscopy. *Nat.*  
17      *Methods.* **10**, 413–420 (2013).
- 18  8.   Bouchard, M. B. *et al.* Swept confocally-aligned planar excitation (SCAPE)  
19      microscopy for high-speed volumetric imaging of behaving organisms. *Nat.*  
20      *Photonics.* **9**, 113–119 (2015).
- 21  9.   Power, R. M. & Huisken, J. A guide to light-sheet fluorescence microscopy for  
22      multiscale imaging. *Nat. Methods.* **14**, 360–373 (2017).
- 23  10.  Winter, P. W. & Shroff, H. Faster fluorescence microscopy: advances in high  
24      speed biological imaging. *Curr. Opin. Chem. Biol.* **20**, 46–53 (2014).
- 25  11.  Levoy, M., Ng, R., Adams, A., Footer, M. & Horowitz, M. Light field microscopy.  
26      *ACM Trans. Graph.* **25**, 924–934 (2006).
- 27  12.  Prevedel, R. *et al.* Simultaneous whole-animal 3D imaging of neuronal activity  
28      using light-field microscopy. *Nat. Methods.* **11**, 727–730 (2014).
- 29  13.  Abrahamsson, S. *et al.* Fast multicolor 3D imaging using aberration-corrected  
30      multifocus microscopy. *Nat. Methods.* **10**, 60–63 (2012).
- 31  14.  Yang, W. *et al.* Simultaneous Multi-plane Imaging of Neural Circuits. *Neuron* **89**,  
32      269–284 (2016).
- 33  15.  Nöbauer, T. *et al.* Video rate volumetric Ca<sup>2+</sup> imaging across cortex using seeded  
34      iterative demixing (SID) microscopy. *Nat. Methods.* **14**, 811–818 (2017).
- 35  16.  Cong, L. *et al.* Rapid whole brain imaging of neural activity in freely behaving  
36      larval zebrafish (*Danio rerio*). *Elife* **6**, 60 (2017).
- 37  17.  Zhu, S., Lai, A., Eaton, K., Jin, P. & Gao, L. On the fundamental comparison  
38      between unfocused and focused light field cameras. *Appl. Opt.* **57**, A1–11 (2018).

- 1 18. Martínez-Corral, M. & Javidi, B. Fundamentals of 3D imaging and displays: a  
2 tutorial on integral imaging, light-field, and plenoptic systems. *Adv. Opt. Photonics*.  
3 **10**, 512–566 (2018).
- 4 19. Descloux, A. *et al.* Combined multi-plane phase retrieval and super-resolution  
5 optical fluctuation imaging for 4D cell microscopy. *Nat. Photonics*. **12**, 165–172  
6 (2018).
- 7 20. Ji, N., Milkie, D. E. & Betzig, E. Adaptive optics via pupil segmentation for high-  
8 resolution imaging in biological tissues. *Nat. Methods*. **7**, 141–147 (2010).
- 9 21. Ji, N. Adaptive optical fluorescence microscopy. *Nat. Methods*. **14**, 374–380  
10 (2017).
- 11 22. Park, J.-H., Kong, L., Zhou, Y. & Cui, M. Large-field-of-view imaging by multi-  
12 pupil adaptive optics. *Nat. Methods*. **14**, 581–583 (2017).
- 13 23. Adie, S. G., Graf, B. W., Ahmad, A., Carney, P. S. & Boppart, S. A. Computational  
14 adaptive optics for broadband optical interferometric tomography of biological  
15 tissue. *Proc. Natl. Acad. Sci. U. S. A.* **109**, 7175–7180 (2012).
- 16 24. Shemonski, N. D. *et al.* Computational high-resolution optical imaging of the  
17 living human retina. *Nat. Photonics*. **9**, 440–443 (2015).
- 18 25. Broxton, M. *et al.* Wave optics theory and 3-D deconvolution for the light field  
19 microscope. *Opt. Express* **21**, 25418–25439 (2013).
- 20 26. Zheng, G., Horstmeyer, R. & Yang, C. Wide-field, high-resolution Fourier  
21 ptychographic microscopy. *Nat. Photonics*. **7**, 739–745 (2013).
- 22 27. Waller, L., Situ, G. & Fleischer, J. W. Phase-space measurement and coherence  
23 synthesis of optical beams. *Nat. Photonics*. **6**, 474–479 (2012).
- 24 28. Humphry, M. J., Kraus, B., Hurst, A. C., Maiden, A. M. & Rodenburg, J. M.  
25 Ptychographic electron microscopy using high-angle dark-field scattering for sub-  
26 nanometre resolution imaging. *Nat. Commun.* **3**, 730 (2012).
- 27 29. Yang, H. *et al.* Electron ptychographic phase imaging of light elements in  
28 crystalline materials using Wigner distribution deconvolution. *Ultramicroscopy*  
29 **180**, 173–179 (2017).
- 30 30. Alonso, M. A. Wigner functions in optics: Describing beams as ray bundles and  
31 pulses as particle ensembles. *Adv. Opt. Photonics*. **3**, 272–365 (2011).
- 32 31. Cohen, N. *et al.* Enhancing the performance of the light field microscope using  
33 wavefront coding. *Opt. Express* **22**, 24817–24839 (2014).
- 34 32. Liu, H.-Y., Zhong, J. & Waller, L. Multiplexed phase-space imaging for 3D  
35 fluorescence microscopy. *Opt. Express* **25**, 14986–14995 (2017).
- 36 33. Ikoma, H., Broxton, M., Kudo, T. & Wetzstein, G. A convex 3D deconvolution  
37 algorithm for low photon count fluorescence imaging. *Sci. Rep.* **8**, 11489 (2018).
- 38 34. Lim, Y. T., Park, J. H., Kwon, K. C. & Kim, N. Resolution-enhanced integral  
39 imaging microscopy that uses lens array shifting. *Opt. Express* **17**, 19253–19263  
40 (2009).

- 1 35. Llavador, A., Sánchez-Ortiga, E., Barreiro, J. C., Saavedra, G. & Martínez-Corral,  
2 M. Resolution enhancement in integral microscopy by physical interpolation.  
3 *Biomed. Opt. Express* **6**, 2854–2863 (2015).
- 4 36. Nakamura, T., Horisaki, R. & Tanida, J. Computational phase modulation in light  
5 field imaging. *Opt. Express* **21**, 29523–29543 (2013).
- 6 37. Boyd, S., Parikh, N., Chu, E., Peleato, B. & Eckstein, J. Distributed optimization  
7 and statistical learning via the alternating direction method of multipliers.  
8 *Foundations and Trends in Machine Learning* **3**, 1–122 (2010).
- 9 38. Li, H. *et al.* Fast, volumetric live-cell imaging using high-resolution light-field  
10 microscopy. *Biomed. Opt. Express* **10**, 29–49 (2019).
- 11 39. Sage, D. *et al.* DeconvolutionLab2: An open-source software for deconvolution  
12 microscopy. *Methods* **115**, 28–41 (2017).
- 13 40. Ma, Y., Li, D., Smith, Z. J., Li, D. & Chu, K. Structured illumination microscopy  
14 with interleaved reconstruction (SIMILR). *J. Biophotonics*. **11**, e201700090  
15 (2017).
- 16 41. Huang, X. *et al.* Fast, long-term, super-resolution imaging with Hessian structured  
17 illumination microscopy. *Nat. Biotechnol.* **36**, 451–459 (2018).
- 18 42. Chen, T.-W. *et al.* Ultrasensitive fluorescent proteins for imaging neuronal activity.  
19 *Nature* **499**, 295–300 (2013).
- 20 43. Xu, J.-C. *et al.* Cultured networks of excitatory projection neurons and inhibitory  
21 interneurons for studying human cortical neurotoxicity. *Sci. Transl. Med.* **8**,  
22 333ra48 (2016).
- 23 44. Zhang, W., Yan, Z., Jan, L. Y. & Jan, Y. N. Sound response mediated by the TRP  
24 channels NOMPC, NANCHUNG, and INACTIVE in chordotonal organs of  
25 *Drosophila* larvae. *Proc. Natl. Acad. Sci. U.S.A.* **110**, 13612–13617 (2013).
- 26 45. Shechtman, Y., Sahl, S. J., Backer, A. S. & Moerner, W. E. Optimal Point Spread  
27 Function Design for 3D Imaging. *Phys. Rev. Lett.* **113**, 133902 (2014).
- 28 46. Thibault, P. & Menzel, A. Reconstructing state mixtures from diffraction  
29 measurements. *Nature* **494**, 68–71 (2013).
- 30 47. Tokunaga, M., Imamoto, N. & Sakata-Sogawa, K. Highly inclined thin  
31 illumination enables clear single-molecule imaging in cells. *Nat. Methods.* **5**, 159–  
32 161 (2008).
- 33 48. Ng, R. Fourier slice photography. *ACM Trans. Graph.* **24**, 735–744 (2005).
- 34 49. Chai, Y. *et al.* Apoptotic regulators promote cytokinetic midbody degradation in  
35 *C. Elegans*. *J. Cell Biol.* **199**, 1047–1055 (2012).

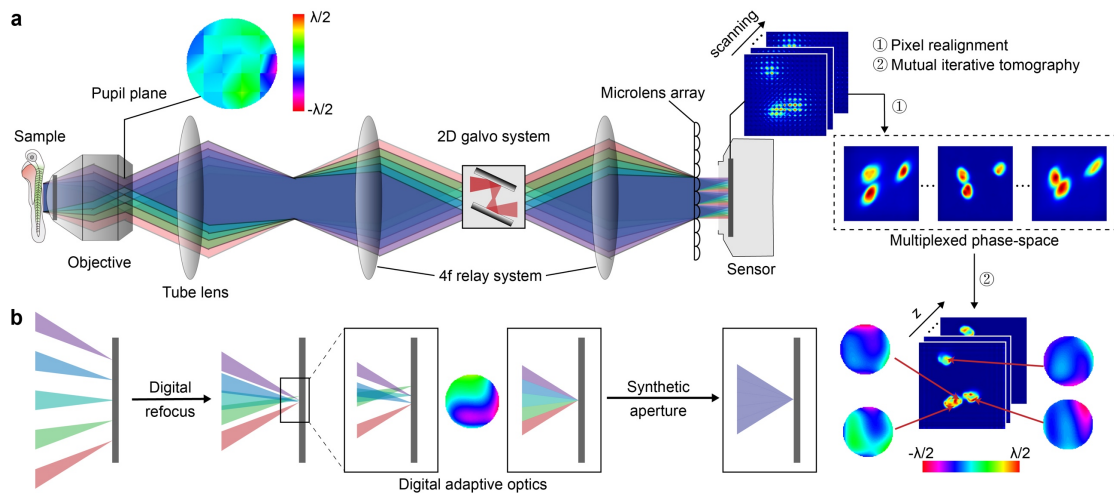

1

2 **Fig. 1 | Schematic of digital adaptive optics scanning lightfield mutual iterative tomography**

3 **(DAOSLIMIT).** **a**, The system works in epi-fluorescence mode. A large volume within the 3D  
4 imaging range is excited simultaneously by a highly-inclined illumination and collected by the  
5 DAOSLIMIT. The inhomogeneous distribution of the refractive index in multicellular specimens  
6 produces strong spatially nonuniform aberrations at the back-pupil plane, which can be segmented for  
7 correction with adaptive optics. For illustration, light from different sub-apertures is labelled with  
8 different colours. A microlens array is inserted at the image plane for parallel acquisition of  
9 multiplexed phase-space measurements, whose resolution is further enhanced by the scanning process  
10 with a two-dimensional galvo scanning system. During reconstruction, we first realign the pixels from  
11 the raw data into the high-resolution multiplexed phase-space. Then, a mutual iterative tomography  
12 algorithm is employed to obtain the high-resolution volume with pixel-wise wavefront corrections. **b**,  
13 The multiplexed phase-space measurements can be synthesized for 3D reconstruction with the digital  
14 beam propagation. However, the sample-induced aberration will result in a distorted focus. We can  
15 digitally shift the sub-aperture point spread function (PSF), akin to applying a correction wavefront  
16 estimated during the volume reconstruction, to create a perfect focus. Both the spatial overlap induced  
17 by scanning and the frequency aliasing induced by the small aperture of each microlens facilitate the  
18 incoherent synthetic aperture during the 3D reconstruction, up to the diffraction limit of the whole  
19 objective's NA.

20



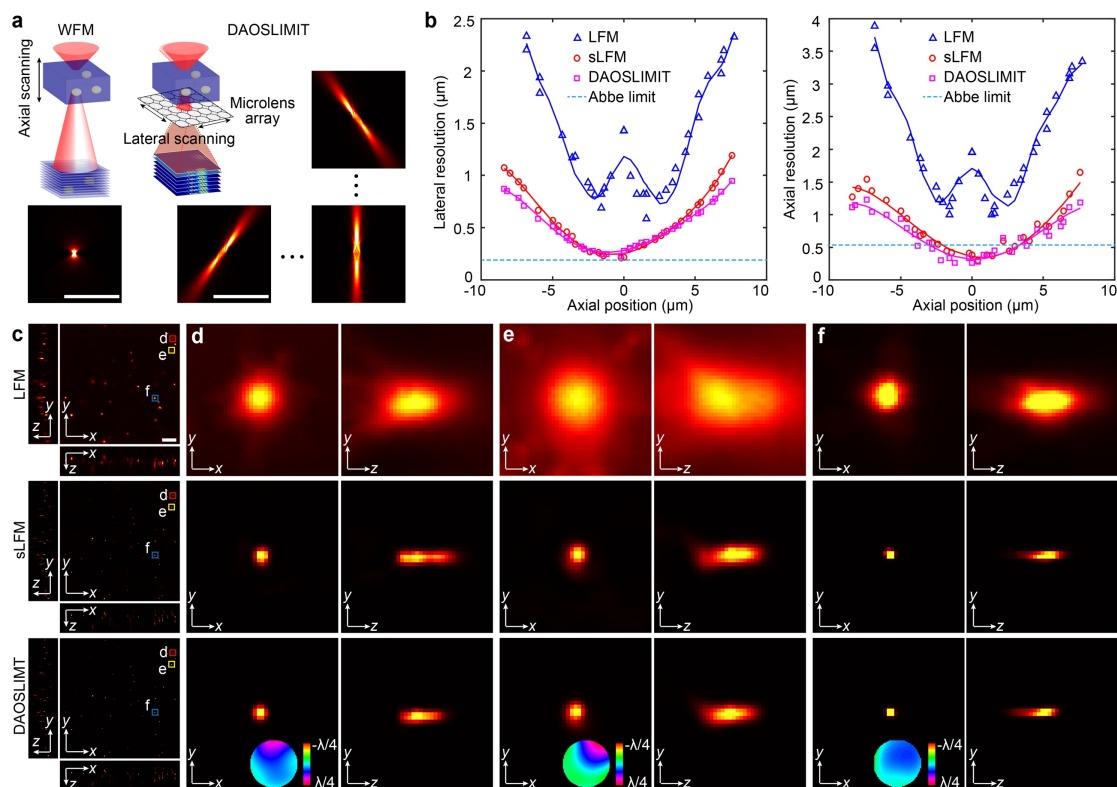

**Fig. 2 | Resolution characterization in 3D fluorescence imaging.** **a**, Different sampling strategies for wide-field fluorescence microscopy (WFM) and DAOSLIMT. The PSFs of DAOSLIMT for different spatial frequency components all have a larger depth of field than the WFM, illustrating the multiplexing capability in a tomographic way. Scale bar: 10  $\mu\text{m}$ . **b**, We characterize the system resolution with 100-nm-diameter fluorescence beads distributed in 1% agarose. For beads at different axial positions, we calculated the lateral and axial resolution by measuring the full width at half-maximum (FWHM) of the lateral and axial profiles with Gaussian fit, respectively. The resolution of LFM is shown by the blue curves with triangles, whereas those of sLFM only and DAOSLIMT are shown by the red curves with circles and the pink curves with rectangles, respectively. The Abbe limit is shown with the blue dashed line for comparison. **c**, Orthogonal maximum intensity projections (MIPs) of 100-nm-diameter fluorescence beads distributed in 1% agarose reconstructed by LFM, sLFM, and DAOSLIMT, respectively. Scale bar: 10  $\mu\text{m}$ . **d-f**, Zoom-in views of different fluorescence beads marked in **c**. The multi-site correction wavefronts are shown at the bottom. Scale bar: 1  $\mu\text{m}$ .

1  
2  
3  
4  
5  
6  
7  
8  
9  
10  
11  
12  
13  
14  
15



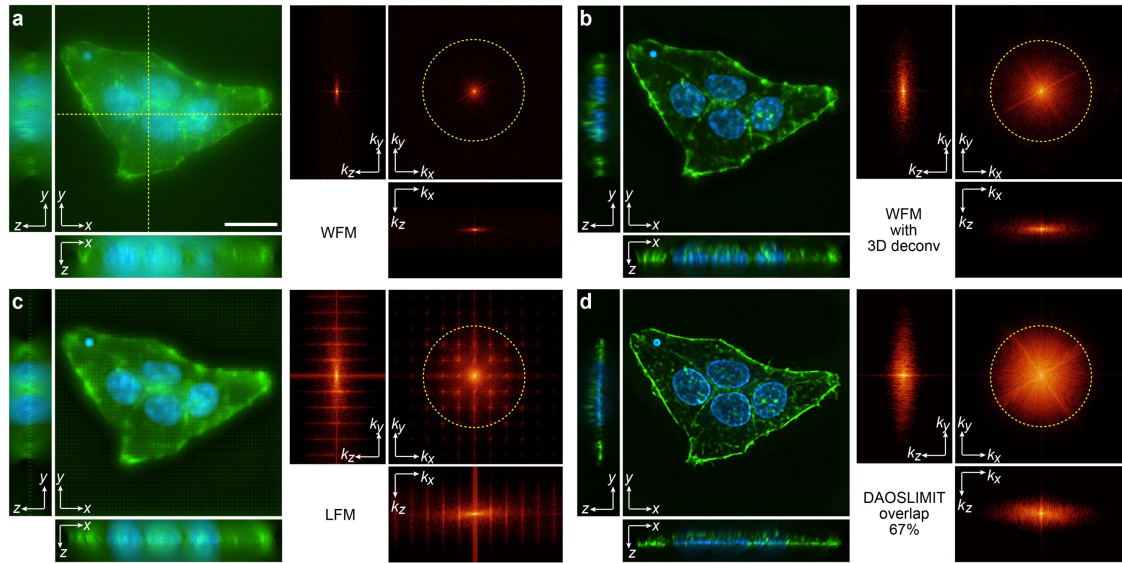

1  
2 **Fig. 3 | SNR and contrast improvements by DAOSLIMIT in 3D fluorescence imaging. a,**  
3 Orthogonal MIPs from 16- $\mu\text{m}$ -thick slabs of the focal stack captured by WFM, including 90 axial  
4 slices at 200-nm steps. The sample used here is a HeLa cell labelled with actin (green) and nuclei  
5 (blue). The Fourier transforms of the MIPs are shown on the right to indicate the degrees of  
6 information recovery in low-SNR conditions. The yellow dashed circle corresponds to the spatial  
7 frequency of the Abbe diffraction limit for comparison. **b,** Results reconstructed by applying 3D RL  
8 deconvolution to the focal stack in **a**, with enhanced SNR and contrast. **c,** Results obtained by  
9 traditional LFM with 3D deconvolution, showing much lower spatial resolution and reconstruction  
10 artefacts close to the native object plane. **d,** Results reconstructed by DAOSLIMIT with a 67% overlap  
11 ratio (corresponding to  $3 \times 3$  lateral shifts), indicating higher SNR and resolution especially in the  $x$ - $z$   
12 and  $y$ - $z$  planes (notably only 9 images are used for 3D reconstruction, 10 times less than WFM). Scale  
13 bar: 20  $\mu\text{m}$ .

14

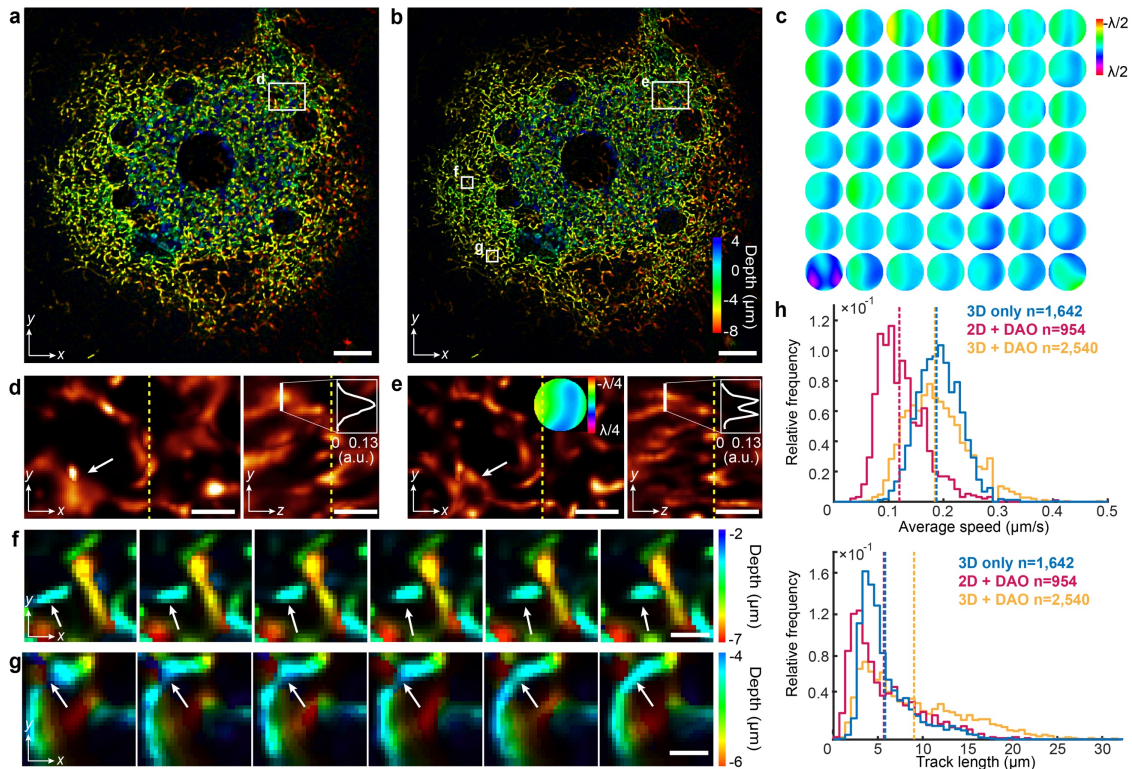

1 **Fig. 4 | Millisecond-scale 3D fluorescence imaging of mitochondrial dynamics with DAO.** **a**,  
 2 Colour-coded MIP of the 3D volume reconstructed by sLFM without DAO. Different colours encode  
 3 different depths. Scale bar: 10  $\mu\text{m}$ . **b**, Colour-coded MIP of the 3D volume reconstructed by  
 4 DAOSLIMIT. Scale bar: 10  $\mu\text{m}$ . **c**, Different corrected wavefronts applied to different areas across  
 5 the field of view in **a**. **d**, Orthogonal MIPs from 2- $\mu\text{m}$ -thick slabs of the selected area in **a**, with a cross-  
 6 section profile illustrating the resolution loss from aberration. The white arrow points to a structure  
 7 blurred by the aberration. Scale bar: 2  $\mu\text{m}$ . **e**, Orthogonal MIPs from 2- $\mu\text{m}$ -thick slabs of the selected  
 8 area in **b**, with a cross-section profile illustrating the diffraction-limited performance with DAO. The  
 9 average correction wavefront of the selected region is shown in the inset at the unit of wavelength.  
 10 The white arrow points to the ring structure resolved after DAO. Scale bar: 2  $\mu\text{m}$ . **f-g**, Colour-coded  
 11 MIPs of the selected areas in **b** at different time stamps marked at the bottom row. The arrow in **f**  
 12 indicates a fast-moving mitochondrion in 3D, whereas the arrow in **g** indicates a mitochondrial fusion  
 13 process happening in 3D. Scale bar: 1  $\mu\text{m}$ . **h**, The distributions of the average speed and tracking  
 14 length with the same tracking algorithm applied to 3D videos without DAO, 2D videos with DAO and  
 15 3D videos with DAO. More accurate speed can be estimated in 3D, whereas the SNR and resolution  
 16 enhancements by DAO facilitate longer tracking duration and more mitochondria under tracking.  
 17

18



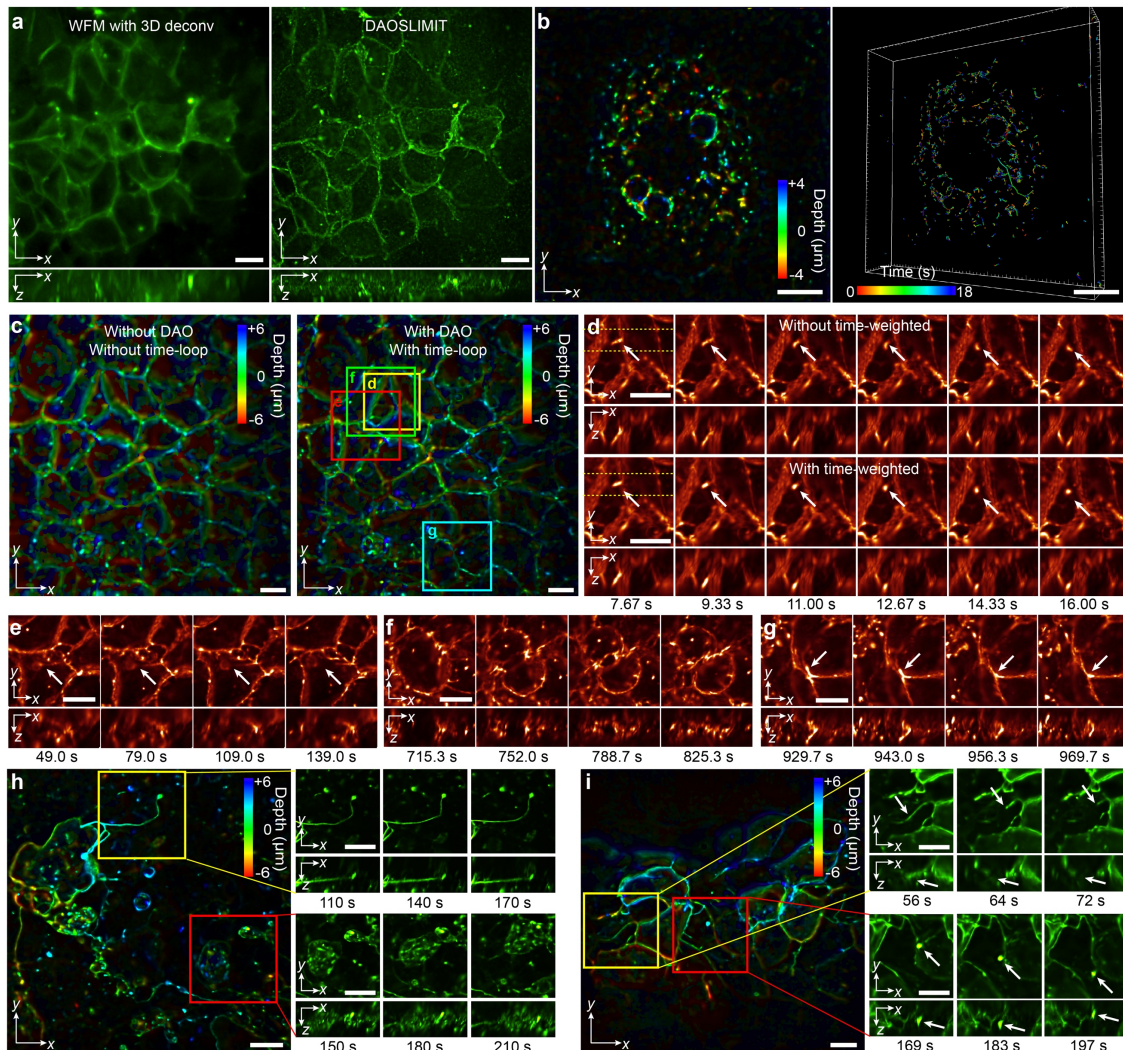

1  
 2 **Fig. 5 | Vesicles and membrane dynamics in zebrafish embryos *in vivo*.** **a**, Orthogonal MIPs of the  
 3 3D membrane structures reconstructed by WFM with 3D deconvolution (left panel) and DAOSLIMIT  
 4 (right panel). **b**, 100 Hz 3D imaging of vesicle dynamics and potential vesicle trafficking in one  
 5 zebrafish epithelial cell in the gastrulation stage (Supplementary Video 2). The colour-coded MIP of  
 6 the volume at 0 s is shown in the left panel with different colours corresponding to different depths.  
 7 The 3D tracking trajectories of every vesicle are shown in the right panel. **c**, The colour-coded MIP  
 8 of the *in vivo* membrane dynamics reconstructed without DAO and time-loop algorithms are shown  
 9 on the left, whereas that reconstructed with DAO, and time-loop algorithms is shown on the right,  
 10 indicating improvement in both SNR and resolution (Supplementary Video 3). **d**, The effectiveness  
 11 of the time-weighted algorithm on the compensation of the sacrificed temporal resolution resulting  
 12 from lateral scanning (Supplementary Video 3). Orthogonal MIPs across 5- $\mu$ m-thick slabs of the  
 13 selected area in c are displayed with different time stamps marked at the bottom row. The results  
 14 without the time-weighted algorithm are shown on the first row, and results with the time-weighted  
 15 algorithm are shown on the second row, which eliminates the motion blur of a moving vesicle (white  
 16 arrow) with the same spatial resolution. **(e-g)** Orthogonal MIPs of the selected areas in c with different

1 time stamps marked at the bottom row (Supplementary Video 4). Dynamic filopodia retraction  
2 processes can be observed in e and g. A cell division process showed gradual membrane enrichment  
3 dynamics at the boundary of daughter cells in f. **h-i**, The colour-coded MIP of the 3D membrane  
4 dynamics *in vivo* at 10 Hz. Different zoom-ins with orthogonal MIPs in h show the 3D movements of  
5 a migrasome and a clear cell migration in 3D at high spatiotemporal resolution (Supplementary Video  
6 6). High-speed fluctuations of the filopodia membrane can be observed in i, including filopodia  
7 retraction process and migrasome movements (Supplementary Video 7). Scale bar: 10  $\mu\text{m}$ .

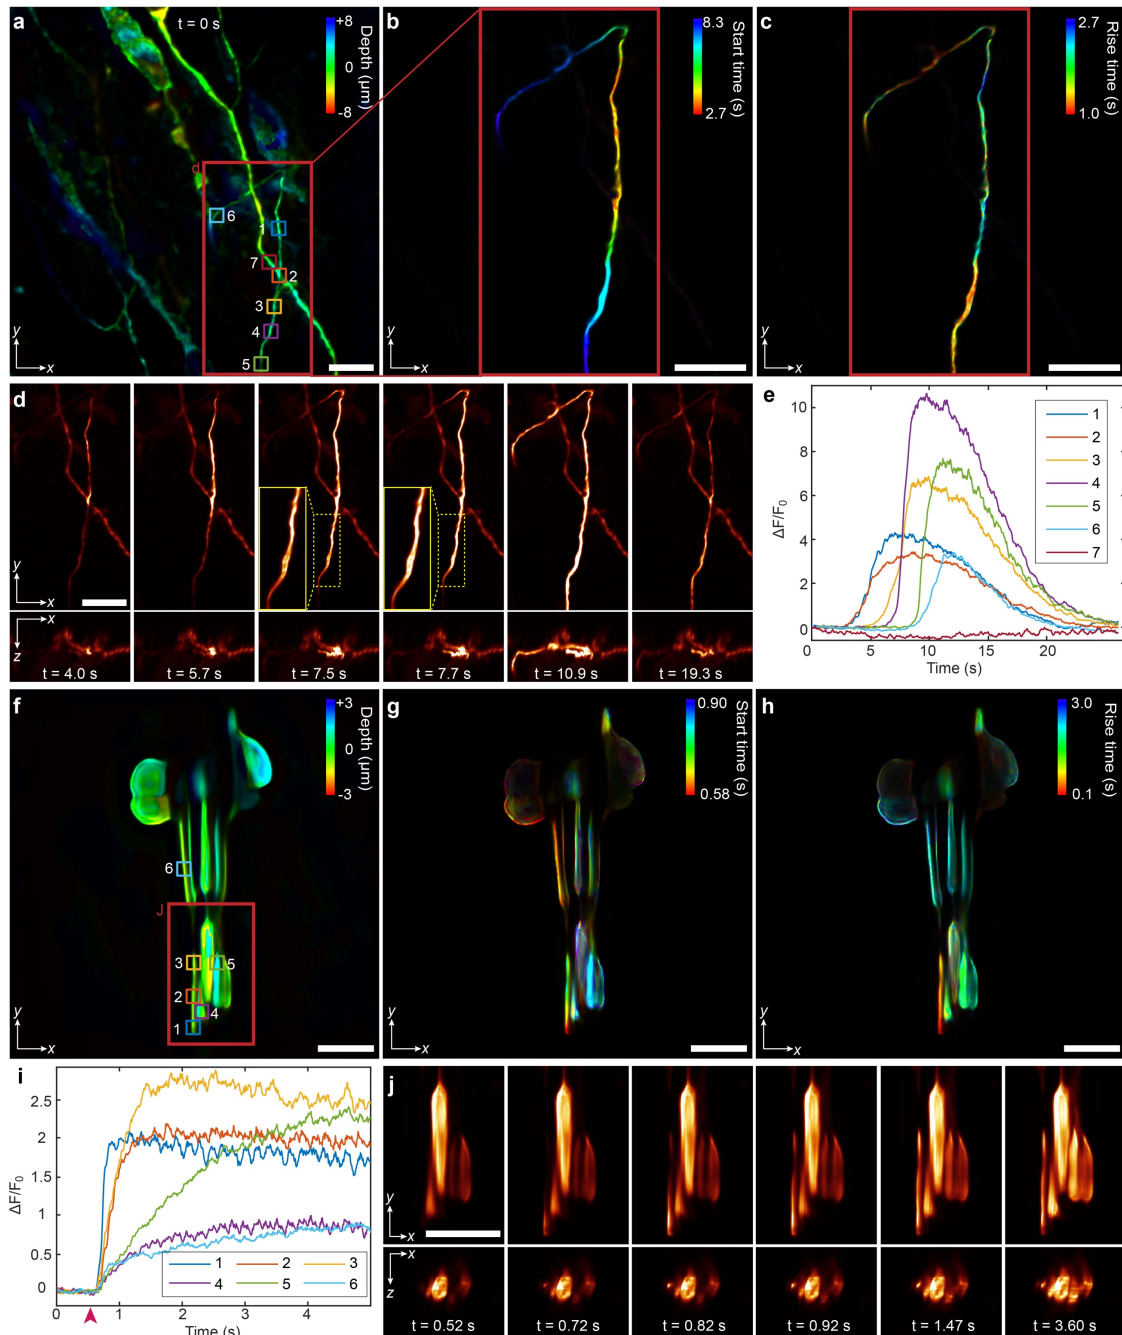

1  
 2 **Fig. 6 | 3D calcium propagation in human 3D cerebral organoids and *Drosophila* larval Cho**  
 3 **neurons.** **a**, Colour-coded MIP of the GCamp6s-labelled human 3D cerebral organoids obtained by  
 4 DAOSLIMIT. Different colours represent different depths. **b**, Temporal-coded MIP of the selected  
 5 area in **a** for the start time (the time point when the signal reaches 10% of the maximum intensity).  
 6 Different colours correspond to the start points of the spontaneous calcium response, and the intensity  
 7 represents the MIP of the temporal trace standard deviation for each voxel. Spontaneous 3D calcium  
 8 propagation evoked from the intersection of two neurons can be clearly observed. **c**, Temporal-coded  
 9 MIP of the selected area in **a**, illustrating the rise time (the time required to increase from 20% to 80%  
 10 of the maximum intensity). Different colours correspond to the rise time of the spontaneous calcium

1 response, and the intensity represents the MIP of the temporal trace standard deviation for each voxel.  
2 **d**, Orthogonal MIPs of the selected areas in **a** with different time stamps marked at the bottom row  
3 (Supplementary Video 9). The video was captured at 30 Hz. **e**, The temporal traces ( $\Delta F/F_0$ ) of the  
4 ROIs labelled in **a**. **f**, Colour-coded MIP of the *Drosophila* larval Cho neurons with the jGCaMP7s  
5 indicator. Different colours represent different depths. **g**, Temporal-coded MIP for start time. **h**,  
6 Temporal-coded MIP for rise time. **i**, The temporal traces ( $\Delta F/F_0$ ) of the ROIs labelled in **f**. The red  
7 arrow indicates the time point when we applied the 500 Hz sound stimulus. **j**, Orthogonal MIPs of the  
8 selected areas in **f** with different time stamps marked at the bottom row (Supplementary Video 10).  
9 The video was captured at 100 Hz. Scale bar: 10  $\mu\text{m}$ .
